# Supplementary material
Source: publisher figshare collection journal article supplement (https://diabetesjournals.figshare.com/articles/dataset/_/16915426)

**sFig. 6 Original Photographs**

Fig. 1M, 2D

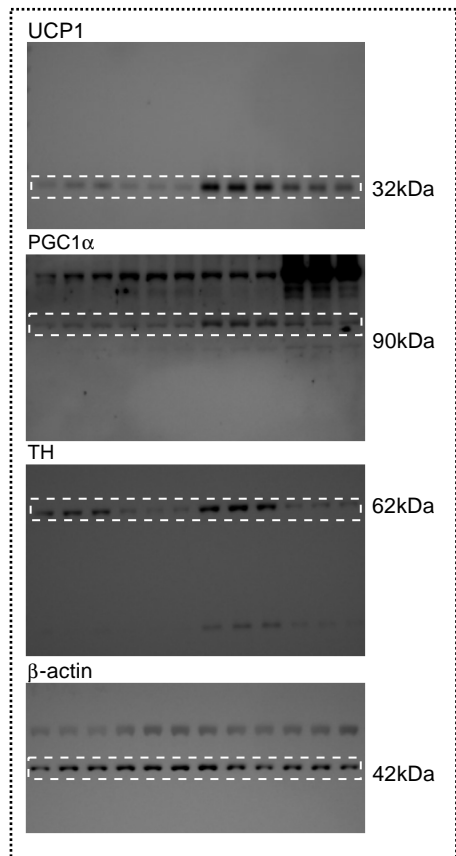

Fig. 2H

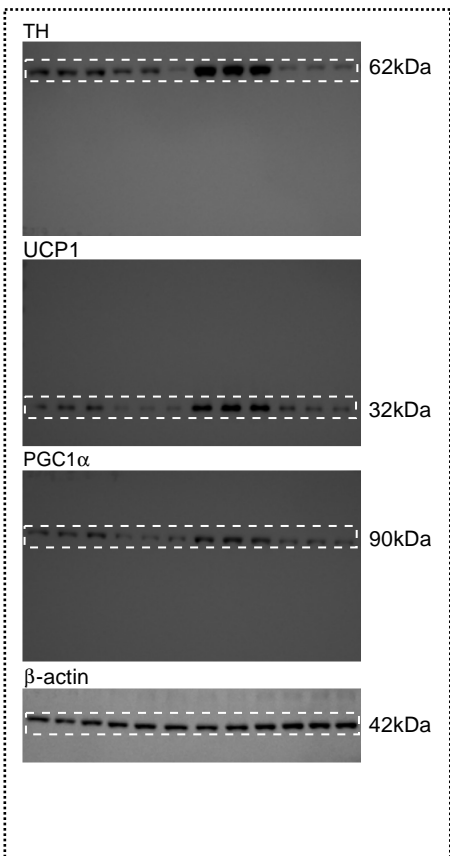

Fig. 5D, 5K

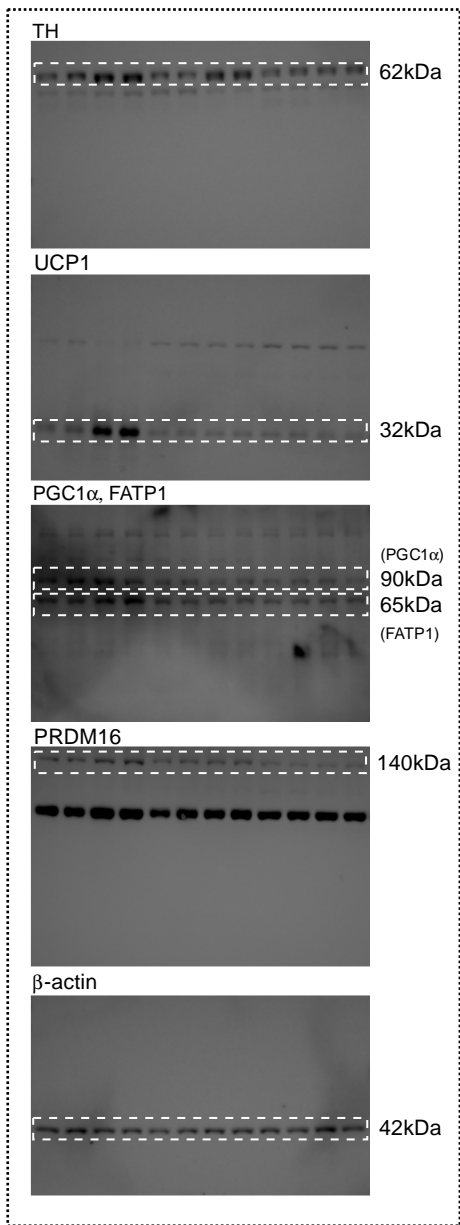

Supplementary Fig. 1M

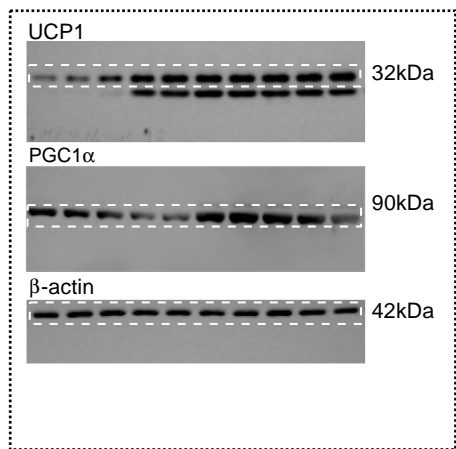

Supplementary Fig. 1N

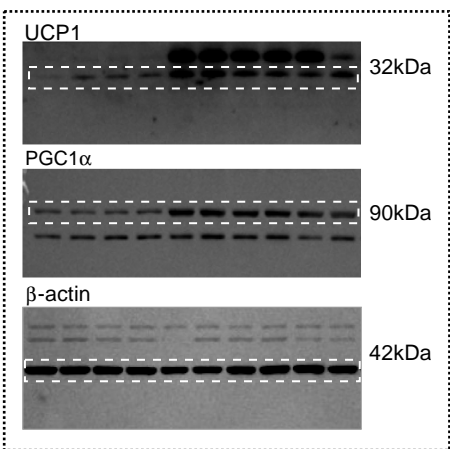

Supplementary Fig. 1O

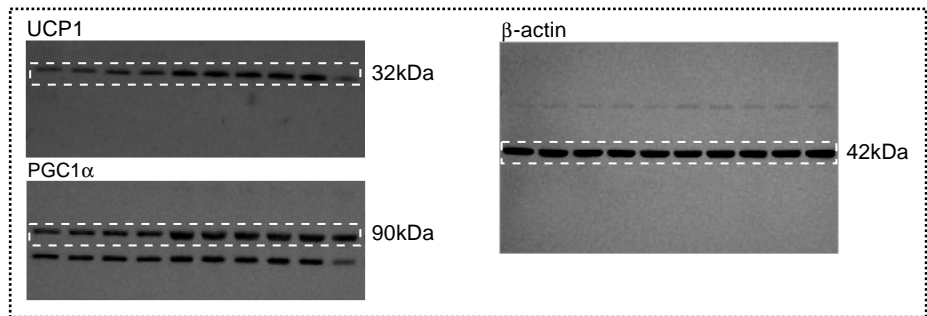

Supplement: Supplementary file 2 [file 1]
