# Supplementary material
Source: publisher figshare collection journal article supplement (https://diabetesjournals.figshare.com/articles/dataset/_/16915426)
Supplement: Supplementary file 5 [file 1]

## **Supplementary Materials for**

**Withaferin A promotes white adipose browning and prevents obesity  
through sympathetic nerve-activated Prdm16-FATP1 axis**

**Supplementary Figure 1 – 6**

**Supplementary table 1**

**Supplementary Figure 1. A 3-week dose-ranging study of WA. (A-D)** Mice were housed at 22°C, fed a HFD, and treated with WA at doses ranging from 0 to 200 µg/kg for 7 days (DMSO, n = 10; WA 0.2 µg/kg, n = 5; WA 2 µg/kg, n = 10; WA 20 µg/kg, n = 8; WA 200 µg/kg, n = 5). **(A)** Schematic illustration of experiments. Mice received DMSO for four days as acclimation, then they were treated with WA or DMSO for 7 consecutive days. **(B)** Body weight. **(C)** Adipose tissue weight. **(D)** Food intake. **(E-H)** Mice were housed at 22°C, fed a HFD, and treated with WA at doses ranging from 0 to 200 µg/kg for 14 days (DMSO, n = 9; WA 0.2 µg/kg, n = 5; WA 2 µg/kg, n = 10; WA 20 µg/kg, n = 8; WA 200 µg/kg, n = 5). **(E)** Schematic illustration of experiments. Mice received DMSO for four days as acclimation, then they were treated with WA or DMSO for 14 consecutive days. **(F)** Body weight. **(G)** Adipose tissue weight. **(H)** Food intake. **(I-L)** Mice were housed at 22°C, fed a HFD, and treated with WA at doses ranging from 0 to 200 µg/kg for 21 days (DMSO, n = 10; WA 0.2 µg/kg, n = 5; WA 2 µg/kg, n = 9; WA 20 µg/kg, n = 9; WA 200 µg/kg, n = 5). **(I)** Schematic illustration of experiments. Mice received DMSO for four days as acclimation, then they were treated with WA or DMSO for 21 consecutive days. **(J)** Body weight. **(K)** Adipose tissue weight. **(L)** Food intake. **(M-O)** Western blot with quantification of Ucp-1 and PGC1α in iWAT of mice treated with WA for 7 days **(M)**, for 14 days **(N)**, and for 21 days **(O)**. Values are mean ± SEM. Significance was determined by one-way ANOVA with Dunnett multiple comparisons. \*p < 0.05, \*\*p < 0.01, and \*\*\*p < 0.001.

**Supplementary Figure 2 (related to figure 1). Analysis of VO<sub>2</sub>, VCO<sub>2</sub> and EE in mice treated with WA. (A)** EE of WA or DMSO-treated mice (n = 5). EE per whole

animal is plotted against body weight. In all panels, lines show fitted regressions. **(B)** Indirect calorimetry was performed to quantify the motor activity of WA or DMSO-treated mice during complete 24 hr light-dark cycles, the arrow indicates the time of WA or DMSO injection ( $n = 5$ ). **(C, D)** Oxygen consumption ( $VO_2$ ) ( $n = 5$ ).  $VO_2$  per whole animal is plotted against body weight. In all panels, lines show fitted regressions. **(E, F)** Carbon dioxide production ( $VCO_2$ ) ( $n = 5$ ).  $VCO_2$  per whole animal is plotted against body weight. In all panels, lines show fitted regressions. Values are mean  $\pm$  SEM. Significance was determined by Student's  $t$  test.  $^{**}p < 0.01$ .

**Supplementary Figure 3 (related to figure 3). Analysis of  $VO_2$ ,  $VCO_2$  and EE in denervated or sham-operated mice treated with WA.** **(A)** EE of denervated or sham-operated mice treated with WA or DMSO ( $n = 5$ ). EE per whole animal is plotted against body weight. In all panels, lines show fitted regressions. **(B)** Indirect calorimetry was performed to quantify the motor activity of denervated or sham-operated mice treated with WA or DMSO during complete 24 hr light-dark cycles, the arrow indicates the time of WA or DMSO injection ( $n = 5$ ). **(C, D)**  $VO_2$  of denervated or sham-operated mice treated with WA or DMSO ( $n = 5$ ).  $VO_2$  per whole animal is plotted against body weight. In all panels, lines show fitted regressions. **(E, F)**  $VCO_2$  of denervated or sham-operated mice treated with WA or DMSO ( $n = 5$ ).  $VCO_2$  per whole animal is plotted against body weight. In all panels, lines show fitted regressions. Values are mean  $\pm$  SEM. Significance was determined by one-way ANOVA with Bonferroni test.  $^*p < 0.05$ ;  $^{**}p < 0.01$ .

**Supplementary Figure 4 (related to figure 5). Analysis of  $VO_2$ ,  $VCO_2$  and EE in**

**shGFP, shPrdm16 or shFATP1-injected mice treated with WA. (A)** EE of shGFP, shPrdm16 or shFATP1-injected mice treated with WA or DMSO (n = 5). EE per whole animal is plotted against body weight. In all panels, lines show fitted regressions. **(B)** Indirect calorimetry was performed to quantify the motor activity of shGFP, shPrdm16 or shFATP1-injected mice treated with WA or DMSO during complete 24 hr light-dark cycles, the arrow indicates the time of WA or DMSO injection (n = 5). **(C, D)** VO<sub>2</sub> of shGFP, shPrdm16 or shFATP1-injected mice treated with WA or DMSO (n = 5). VO<sub>2</sub> per whole animal is plotted against body weight. In all panels, lines show fitted regressions. **(E, F)** VCO<sub>2</sub> of shGFP, shPrdm16 or shFATP1-injected mice treated with WA or DMSO (n = 5). VCO<sub>2</sub> per whole animal is plotted against body weight. In all panels, lines show fitted regressions. Values are mean ± SEM. Significance was determined by one-way ANOVA with Tukey post hoc test. \*p < 0.05; \*\*p < 0.01.

**Supplementary Figure 5. Correlation analysis between Prdm16, FATP1, Pgc1α and DβH in human adipose tissue.** <sup>53</sup> Correlation analysis between Prdm16, FATP1, Pgc1α and DβH in human subcutaneous **(A-D)** and visceral **(E-H)** adipose tissues (using GTExv5 databases).

**Supplementary Figure 6. Original full western blot images.**

**Supplementary table 1: Primers used in the present study**

| Primer        | Forward Primer 5'-3'     | Reverse Primer 5'-3'     |
|---------------|--------------------------|--------------------------|
| <i>Ucp1</i>   | ACTGCCACACCTCCAGTCATT    | CTTTGCCTCACTCAGGATTGG    |
| <i>Prdm16</i> | CAGCACGGTGAAGCCATTC      | GCGTGCATCCGCTTGTG        |
| <i>FATP1</i>  | AGCCTGGTCAAGTTCTGTTCTGGA | AGAAGAGTCGATCATCCATGCCCT |

|               |                          |                          |
|---------------|--------------------------|--------------------------|
| <i>Pgc1α</i>  | AGCCGTGACCACTGACAACGAG   | GCTGCATGGTTCTGAGTGCTAAG  |
| <i>Ppara</i>  | GGGTACCACTACGGAGTTCACG   | CAGACAGGCACTTGTGAAAACG   |
| <i>Pparγ</i>  | GTGCCAGTTTCGATCCGTAGA    | GGCCAGCATCGTGTAGATGA     |
| <i>Cox7α1</i> | CAGCGTCATGGTCAGTCTGT     | AGAAAACCGTGTGGCAGAGA     |
| <i>Cox8β</i>  | GAACCATGAAGCCAACGACT     | GCGAAGTTCACAGTGGTTCC     |
| <i>Cited</i>  | ACTAGCTCCTCTGGATCGACA    | GACCCAGTTTTGCATGGGC      |
| <i>Elovl3</i> | TTCTCACGCGGGTTAAAAATGG   | GAGCAACAGCTAGACGACCAC    |
| <i>Cpt1</i>   | TGGCATCATCACTGGTGTGTT    | GTCTAGGGTCCGATTGATCTTTG  |
| <i>Cidea</i>  | TGCTCTTCTGTATCGCCCAGT    | GCCGTGTTAAGGAATCTGCTG    |
| <i>Mcad</i>   | ATGACGGAGCAGCCAATGAT     | TCGTCACCCTTCTTCTCTGCTT   |
| <i>Metrn1</i> | CTGGAGCAGGGAGGCTTATTT    | GGACAACAAAGTCACTGGTACAG  |
| <i>HSP70</i>  | TGGTGCTGACGAAGATGAAG     | AGGTCGAAGATGAGCACGTT     |
| <i>Nrf1</i>   | CAGCAACCCTGATGGCACCGTGTC | GGCCTCTGATGCTTGCGTCGTCTG |
| <i>Dio2</i>   | AGAGTGGAGGCGCATGCT       | GGCATCTAGGAGGAAGCTGTTC   |
| <i>Adrb3</i>  | TTGTCCTGGTGTGGATCGTG     | TTGGAGGCAAAGGAACAGCA     |
| <i>LepR</i>   | TGTTTTGGGACGATGTTCCA     | AAAGATGCTCAAATGTTTCAGGC  |
| <i>JAK2</i>   | AGAAAGGGCGGAATAAGGGC     | CTGCTCCAACTCACGAATCCT    |
| <i>Stat3</i>  | CACCTTGATTGAGAGTCAAGAC   | AGGAATCGGCTATATTGCTGGT   |
| <i>Stat5</i>  | CAGATGCAAGTGTTGTATGGGC   | GCTGGCTCTCGATCCACTG      |
| <i>PI3K</i>   | CGAGAGTGTCGTCACAGTGTC    | TGTTGCTTCCACAAACACAG     |
| <i>AKT</i>    | ATGAACGACGTAGCCATTGTG    | TTGTAGCCAATAAAGGTGCCAT   |

|              |                          |                           |
|--------------|--------------------------|---------------------------|
| <i>mTOR</i>  | CAGTTCGCCAGTGGACTGAAG    | GCTGGTCATAGAAGCGAGTAGAC   |
| <i>S6K1</i>  | CTGAGAAGGCCGATCCATCC     | TGACCTTGCGTACCAGGAAGA     |
| <i>PDE3b</i> | AAAGCGCAGCCGGTTACTAT     | CCATATTGCGAGCTTCATTTAGC   |
| <i>AMPK</i>  | TCTGAGGGGCACCAAGAAAC     | GTGGGTGTTGACGGAGAAGAG     |
| <i>FoxO1</i> | CAATCTGTCCCTTCACAGCA     | CTCCCTCTGGATTGAGCATC      |
| <i>Mchr1</i> | ATGGATCTGCAAGCCTCGTTG    | CCCGCCAATGTGAAATTATCCTG   |
| <i>Pomc</i>  | ATGCCGAGATTCTGCTACAGT    | TCCAGCGAGAGGTGAGTTT       |
| <i>Agrp</i>  | ATGCTGACTGCAATGTTGCTG    | CAGACTTAGACCTGGGAACTCT    |
| <i>Npy</i>   | ATGCTAGGTAACAAGCGAATGG   | TGTCGCAGAGCGGAGTAGTAT     |
| <i>ROCK1</i> | GACTGGGGACAGTTTTGAGAC    | ATCCAAATCATAAACCAGGGCAT   |
| <i>TRPC</i>  | TTCACTGAGACCTTTTTGACCG   | TGGCACTCAACGAAGTCACTG     |
| <i>Sitr1</i> | GCTGACGACTTCGACGACG      | TCGGTCAACAGGAGGTTGTCT     |
| <i>MAGEL</i> | AATGCCGCATGTTCCCATTAC    | ATGGATCATCACGACACCAGG     |
| <i>MFN2</i>  | AGAACTGGACCCGGTTACCA     | CACTTCGCTGATACCCCTGA      |
| <i>BDNF</i>  | TCATACTTCGGTTGCATGAAGG   | AGACCTCTCGAACCTGCCC       |
| <i>Socs3</i> | GAGTACCCCCAAGAGAGCTTACTA | CTCCTTAAAGTGGAGCATCATACTG |
| <i>Gpr17</i> | GCTTACTCTGAGCAATGCGGA    | GTGATAAACCAACCGGGTAGG     |
| <i>PTEN</i>  | TGGATTCGACTTAGACTTGACCT  | GCGGTGTCATAATGTCTCTCAG    |
| <i>GSK3b</i> | ATGGCAGCAAGGTAACCACAG    | TCTCGGTTCTTAAATCGCTTGTC   |
| <i>Gapdh</i> | AGGTCGGTGTGAACGGATTTG    | TGTAGACCATGTAGTTGAGGTCA   |
