# Supplementary material
Source: publisher figshare collection journal article supplement (https://diabetesjournals.figshare.com/articles/dataset/_/16915426)

sFig. 5

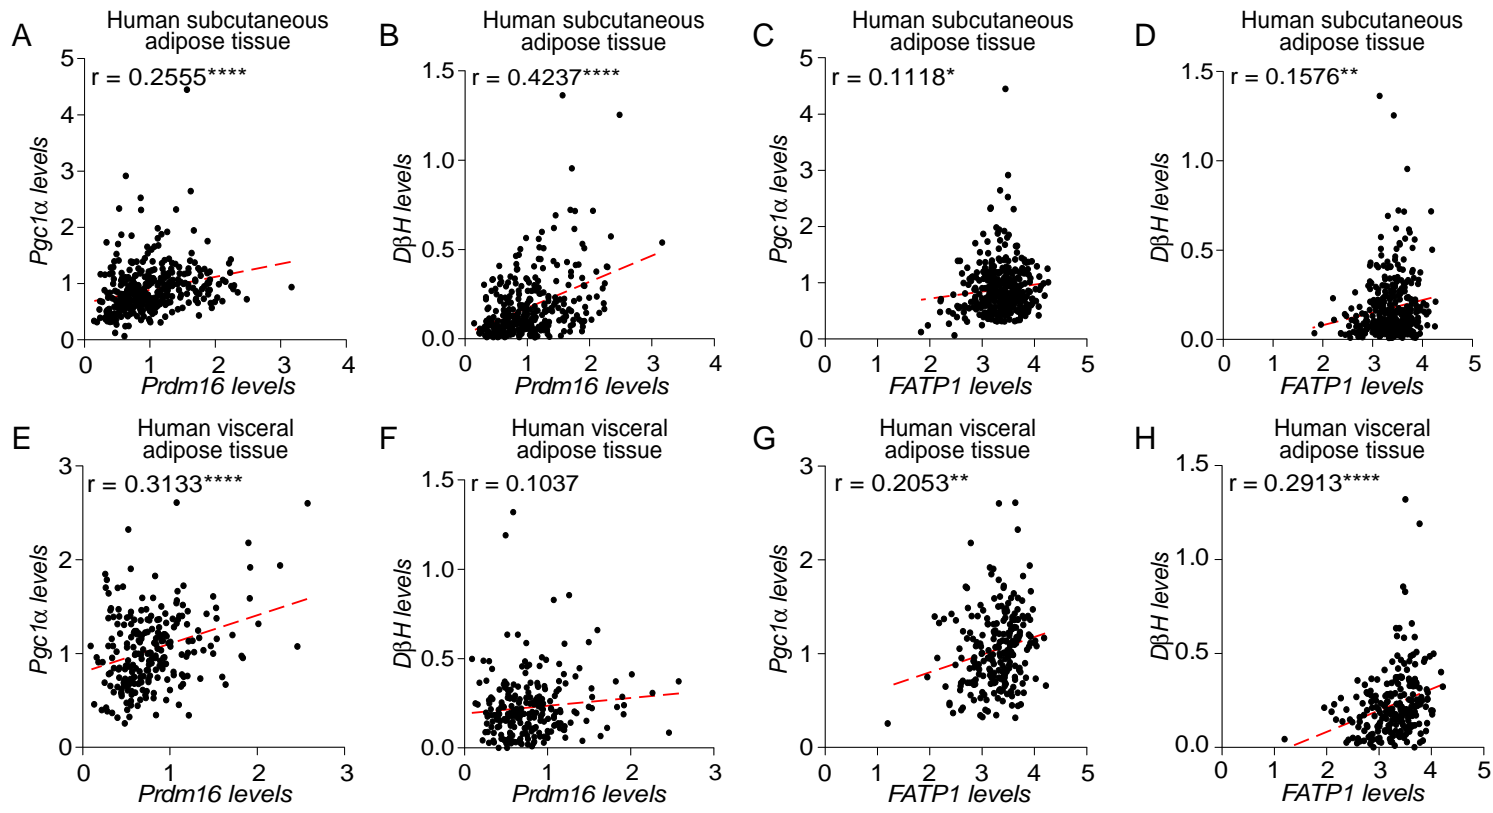

Supplement: Supplementary file 1 [file 1]

**sFig. 4**

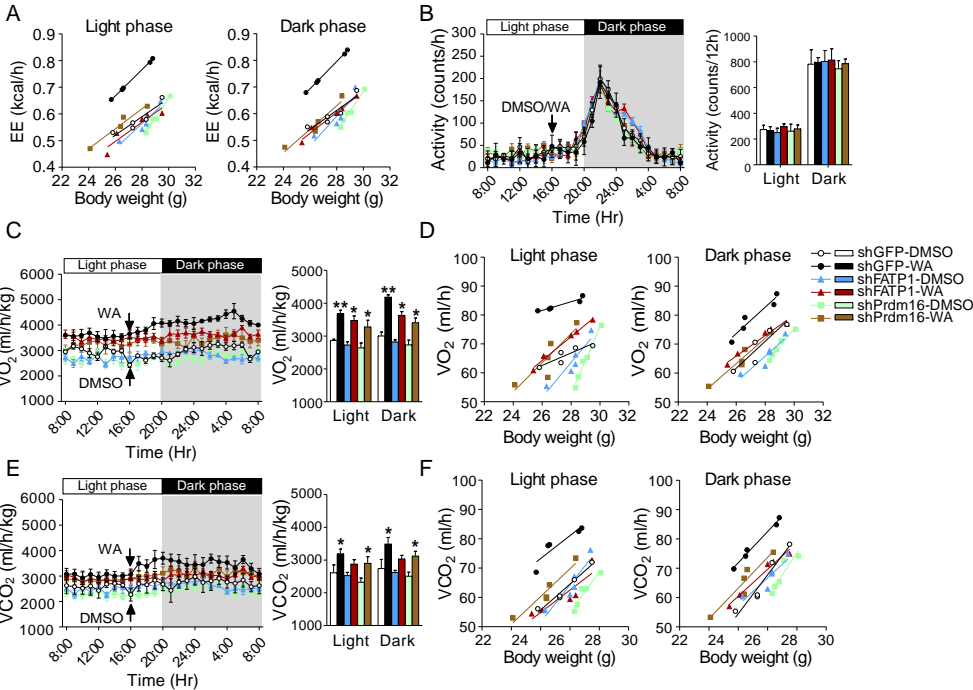

Supplement: Supplementary file 3 [file 1]

**sFig. 3**

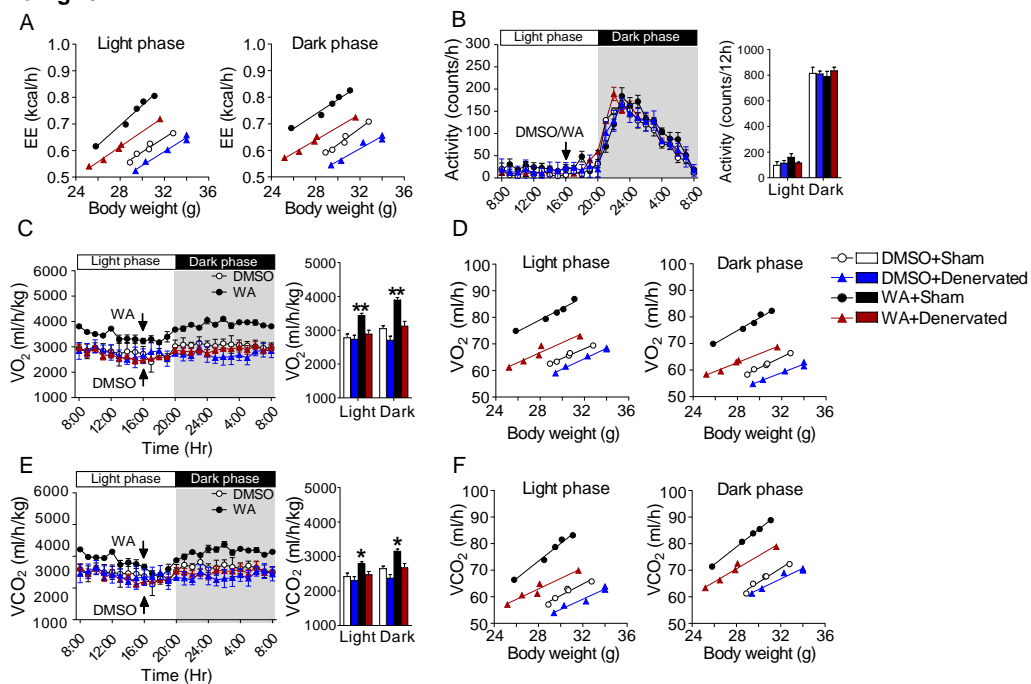

Supplement: Supplementary file 4 [file 1]

sFig. 1

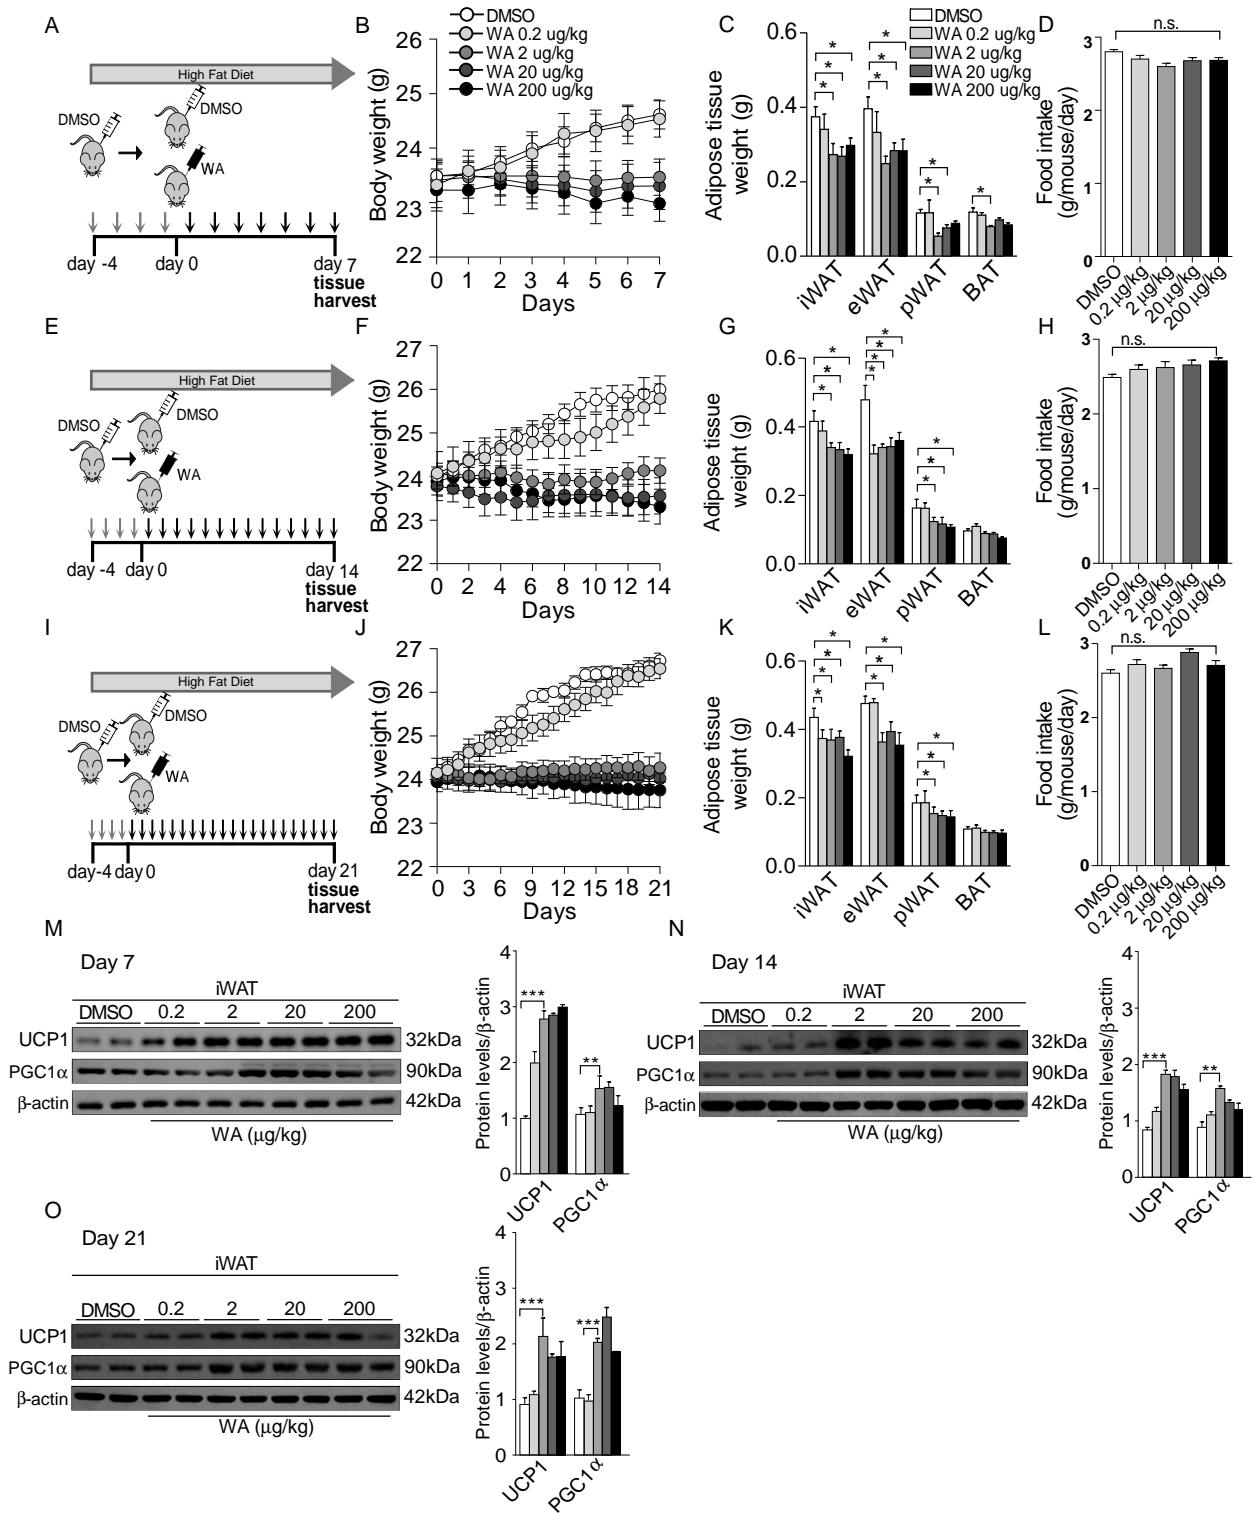

Supplement: Supplementary file 6 [file 1]

**sFig. 2**

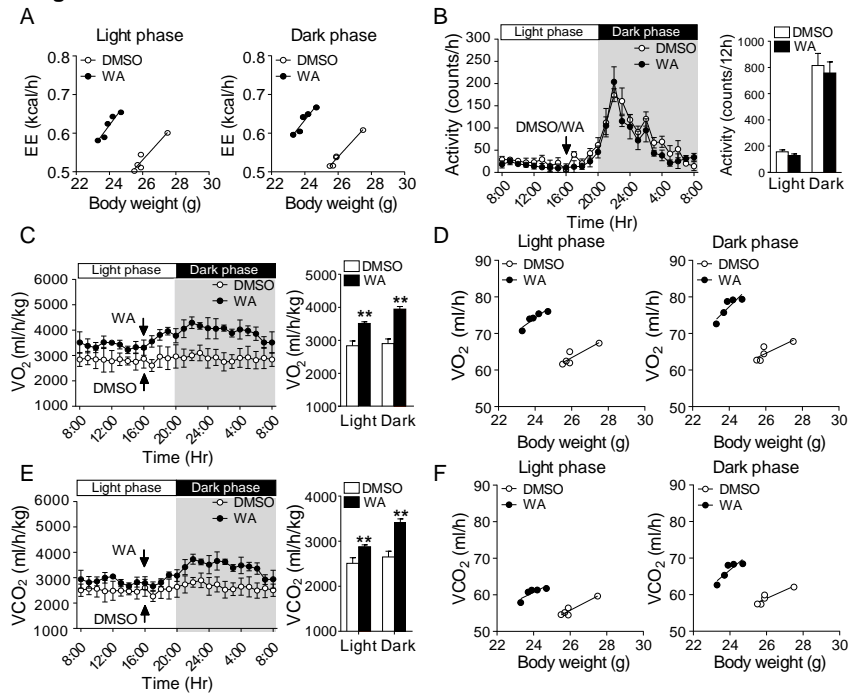

Supplement: Supplementary file 7 [file 1]
